# Supplementary material for: Synthesis and characterization of novel donor–acceptor type neutral green electrochromic polymers containing an indolo[3,2-b]carbazole donor and diketopyrrolopyrrole acceptor
Source: Royal Society of Chemistry journal article supplement (doi:10.1039/c8ra03552k), 2018-01-01
Supplement: c8ra03552k1.pdf [file c8ra03552k1.pdf]

### Electronic supplementary information

Yan Zhang,<sup>a</sup> Lingqian Kong,<sup>b</sup> Xiuping Ju,<sup>b</sup> Hongmei Du<sup>a</sup>, Jinsheng Zhao<sup>\*a</sup>, Yu Xie<sup>\*c</sup>

<sup>a</sup>Shandong Key Laboratory of Chemical Energy Storage and Novel Cell Technology, Liaocheng University, Liaocheng, 252059, P. R. China.

<sup>b</sup>Dongchang College, Liaocheng University, Liaocheng, 252059, P. R. China.

<sup>c</sup>College of Environment and Chemical Engineering, Nanchang Hangkong University, Nanchang 330063, PR China.

\*Correspondence: [j.s.zhao@163.com](mailto:j.s.zhao@163.com) (Jinsheng Zhao); [xieyu\\_121@163.com](mailto:xieyu_121@163.com) (Yu Xie)

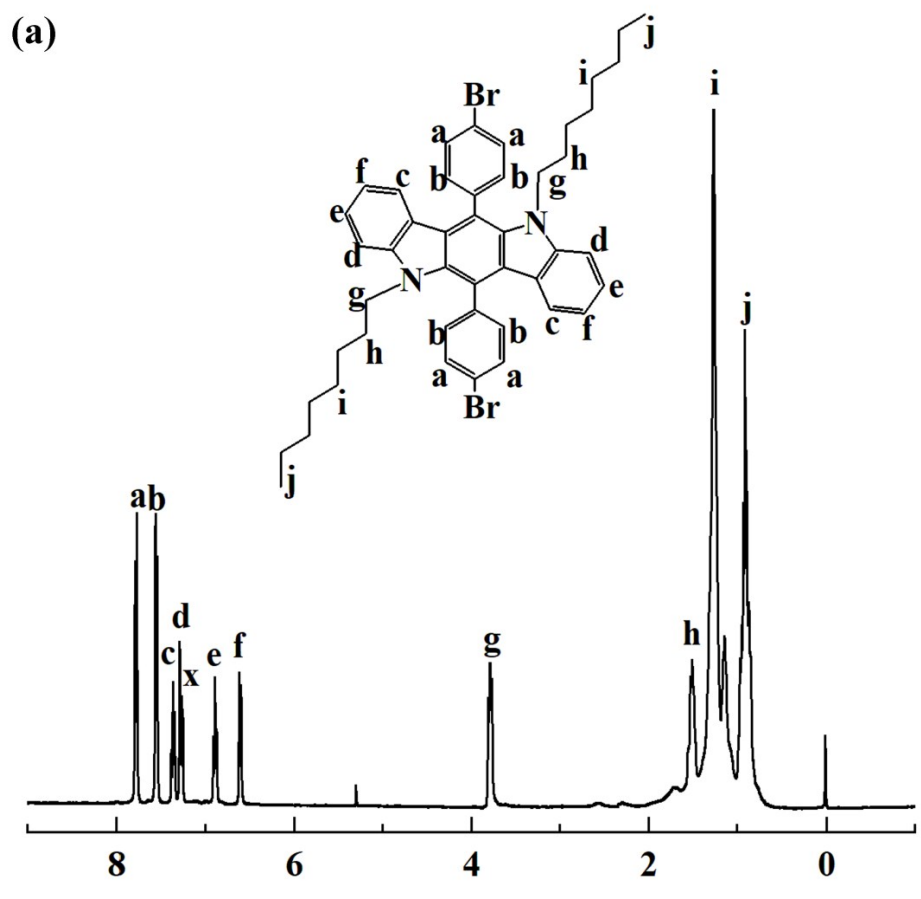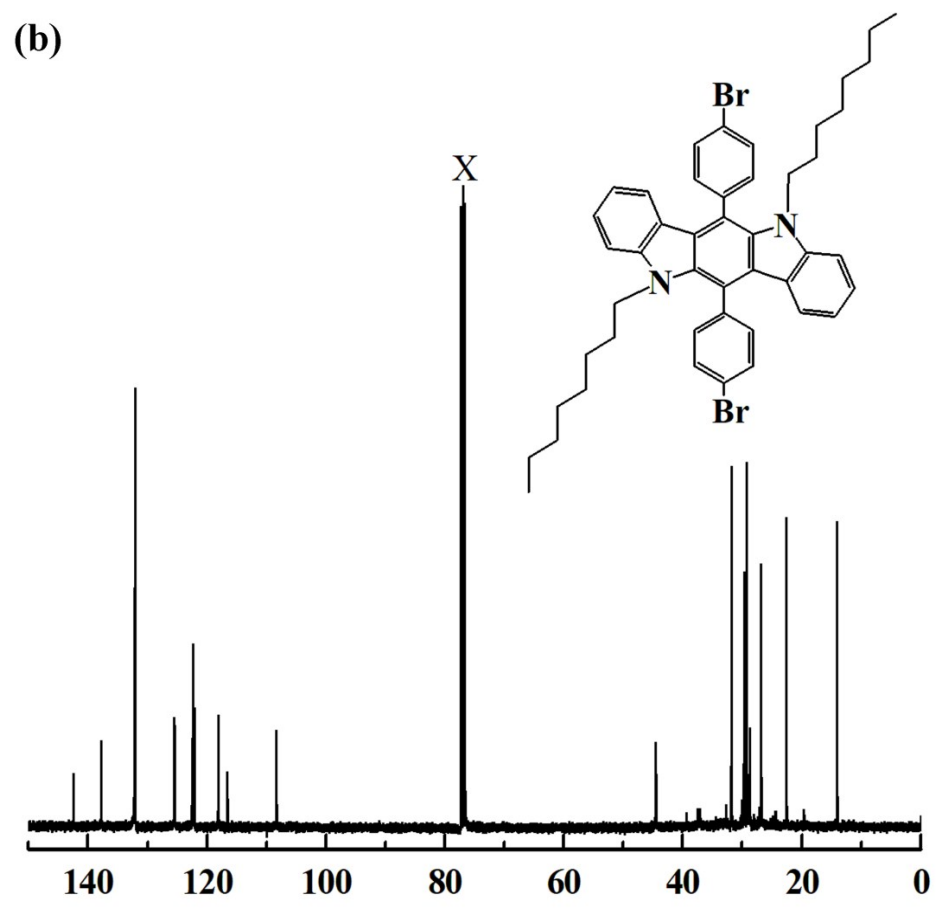

**Figure S1.** (a)  $^1\text{H}$  NMR spectrum of 6,12-bis(4-bromophenyl)-5,11-dioctyl-5,11-dihydroindolo[3,2-b]carbazole in  $\text{CDCl}_3$ , solvent peak at  $\delta = 7.26$  ppm was marked by “x”, (b)  $^{13}\text{C}$  NMR spectrum of 6,12-bis(4-bromophenyl)-5,11-dioctyl-5,11-dihydroindolo[3,2-b]carbazole in  $\text{CDCl}_3$ , solvent peak at  $\delta = 77.01$  ppm was marked by “X”.

**(a) PDTCZ-1**

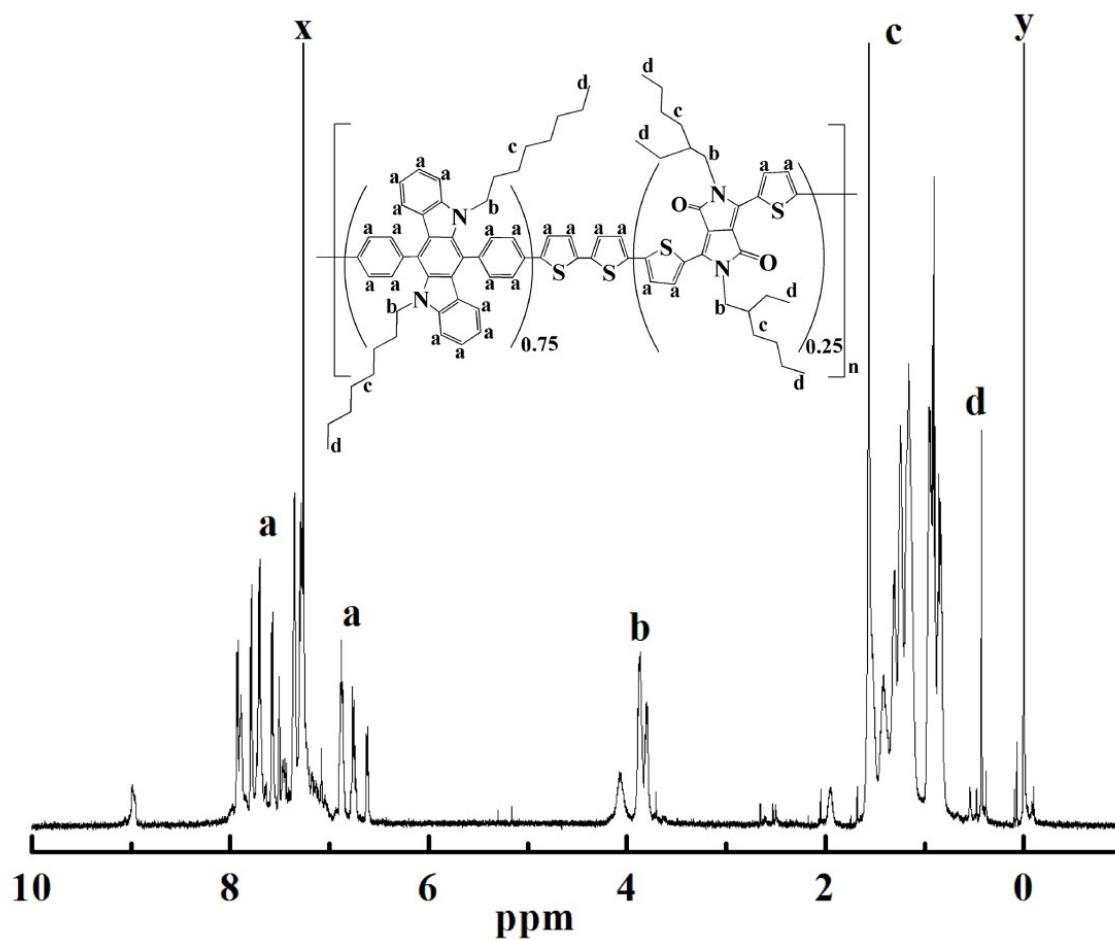

**(b) PDTCZ-2**

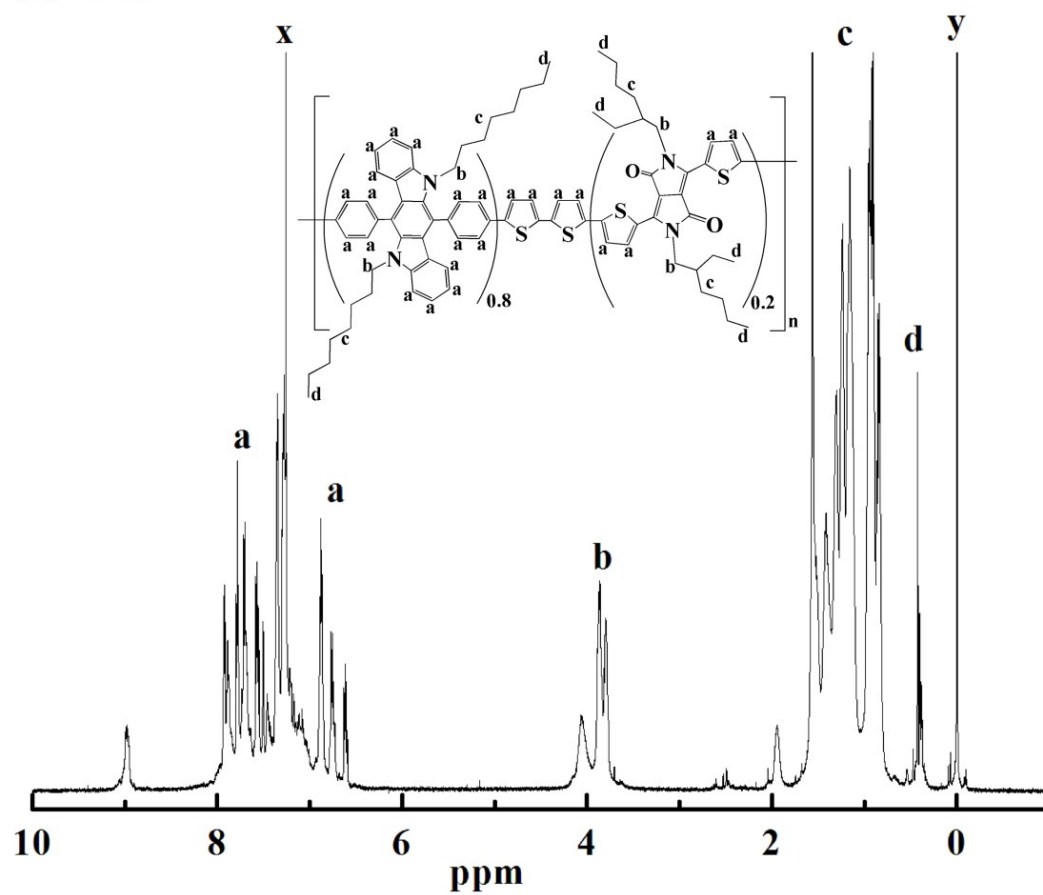

**Figure S2.**  $^1\text{H}$  NMR spectra of (a) PDTCZ-1 and (b) PDTCZ-2 in  $\text{CDCl}_3$ . Solvent and tetramethylsilane peaks were marked by “x”, “y” respectively.
